# Supplementary material for: Making Inclusive Product Design a Reality: How Company Culture and Research Bias Impact Investment
Source: Atypon-hosted journal article supplement (doi:10.1287/mksc.2023.1438), 2023-05-05
Supplement: mksc.2023.1438.sm1.pdf [file mksc.2023.1438.sm1.pdf]

# Online Appendix

## Making Inclusive Product Design a Reality: How Company Culture and Research Bias Impact Investment

Jeffery D. Shulman • University of Washington • jshulman@uw.edu

Zheyin (Jane) Gu • University of Connecticut • jane.gu@uconn.edu

### 1. Proof of results in the case of no research bias

From conditional probabilities as specified in Table 1, we derive  $Pr(sig = H) = Pr(sig = H|H)Pr(H) + Pr(sig = H|L)Pr(L) = y$ . By Bayes Rule, we have

$$Pr(H|sig = H) = \frac{Pr(sig = H|H)Pr(H)}{Pr(sig = H)} = Pr(sig = H|H) = k + (1 - k)y; \quad (1)$$

$$Pr(H|sig = L) = \frac{Pr(sig = L|H)Pr(H)}{Pr(sig = L)} = Pr(sig = H|L) = (1 - k)y. \quad (2)$$

If the firm receives  $sig = H$ , its expected profit from investing is

$$Pr(H|sig = H)\frac{1+x}{4} + Pr(L|sig = H)\frac{1}{4} - c = \frac{1}{4}(1 + xy + kx(1 - y) - 4c). \quad (3)$$

This expected profit is greater than its profit of  $\frac{1}{4}$  from not investing if  $xy > 4c$  or  $xy < 4c \& k \geq \frac{4c - xy}{x(1 - y)}$ . If the firm receives  $sig = L$ , its expected profit from investing is

$$Pr(H|sig = L)\frac{1+x}{4} + Pr(L|sig = L)\frac{1}{4} - c = \frac{1}{4}(1 + xy - kxy - 4c). \quad (4)$$

This expected profit is greater than its profit of  $\frac{1}{4}$  from not investing in inclusive product design if  $xy > 4c \& k < \frac{xy - 4c}{xy}$ .

We can then summarize the firm's investment decision below:

a) If  $xy > 4c \& 0 \leq k < \frac{xy - 4c}{xy}$ , the firm always invests, that is,  $Pr_{nb}(I) = 1$ . In this case, the probability of realizing a high demand is  $Pr(H) = y$ . The firm's expected profit is  $\pi_{nb} = y\frac{1+x}{4} + (1 - y)\frac{1}{4} - c = \frac{1}{4}(1 + xy - 4c)$  and does not vary with  $k$ .

b) If  $xy > 4c$  &  $\frac{xy-4c}{xy} \leq k \leq 1$ , the firm always invests upon receiving  $sig = H$ , but never invests upon receiving  $sig = L$ . That is,  $Pr_{nb}(I) = Pr(sig = H) = y$ . In this case, the probability of investing and realizing a high demand is  $Pr(H|sig = H)Pr(sig = H) = (k + (1 - k)y)y$  and the probability of investing but realizing a low demand is  $Pr(L|sig = H)Pr(sig = H) = (1 - k)(1 - y)y$ . The firm's expected profit is  $\pi_{nb} = Pr(H|sig = H)Pr(sig = H)(\frac{1+x}{4} - c) + Pr(L|sig = H)Pr(sig = H)(\frac{1}{4} - c) + Pr(sig = L)\frac{1}{4} = \frac{1}{4}(1 + xy^2 - 4cy + kxy(1 - y))$ .

This profit increases with  $k$ .

c) If  $xy < 4c$  &  $\frac{4c-xy}{x(1-y)} \leq k \leq 1$ , the firm always invests upon receiving  $sig = H$  but never invests upon receiving  $sig = L$ . This leads to the same outcome as in b).

d) If  $xy < 4c$  &  $0 < k < \frac{4c-xy}{x(1-y)}$ , the firm never invests, that is,  $Pr_{nb}(I) = 0$ . The firm's profit is always  $\pi_{nb} = \frac{1}{4}$  and does not vary with  $k$ .

The firm's expected profit as a function of  $k$  can be written as

$$\pi_{nb}(k) = \begin{cases} y\frac{1+x}{4} + (1-y)\frac{1}{4} - c = \frac{1}{4}(1 + xy - 4c) & \text{if } xy > 4c \text{ \& } k \leq \frac{xy-4c}{xy} \\ \frac{1}{4} & \text{if } xy < 4c \text{ \& } k \leq \frac{4c-xy}{x(1-y)} \\ (k + (1-k)y)y(\frac{1+x}{4} - c) + (1-k)(1-y)y(\frac{1}{4} - c) & \text{if } \textit{otherwise.} \\ + (1-y)\frac{1}{4} = \frac{1}{4}(1 + xy^2 + kxy(1-y) - 4cy) & \end{cases} \quad (5)$$

Rationally anticipating the firm's investment strategy, the unbiased researcher decides her effort level to maximize her expected payoff,

$$\Gamma_{nb}(k) = \begin{cases} yR - (1-y)N - k^2 & \text{if } xy > 4c \text{ \& } k < \frac{xy-4c}{xy} \\ -k^2 & \text{if } xy < 4c \text{ \& } k < \frac{4c-xy}{x(1-y)} \\ (k + (1-k)y)yR - (1-k)(1-y)yN - k^2 & \text{if } \textit{otherwise.} \end{cases} \quad (6)$$

Below we solve for the researcher's optimal effort level in the reward-oriented culture and the punishment oriented culture separately.

**Reward-oriented culture** ( $R > 0$  &  $N = 0$ )

We consider the following conditions.

a) If  $xy > 4c$  &  $0 \leq k < \frac{xy-4c}{xy}$ , the firm always invests, that is,  $Pr_{nb}(I) = 1$ . The researcher's expected payoff is  $\Gamma_{nb} = yR - k^2$ . It is straightforward that the optimal effort level is  $k_{nb}^* = 0$ , which leads to researcher payoff of  $\Gamma_{nb}^* = yR$  and firm profit of  $\pi_{nb}^* = \frac{1}{4}(1 + xy - 4c)$ .

b) If  $xy > 4c$  &  $k \geq \frac{xy-4c}{xy}$ , the firm invests only upon receiving  $sig = H$ , that is,  $Pr_{nb}(I) = Pr(sig = H) = y$ . The researcher's expected payoff is  $\Gamma_{nb} = (k + (1 - k)y)yR - k^2$ , which is maximized at interior solution  $k^* = \min\{1, \frac{R(1-y)y}{2}\}$ . Note that this interior solution is valid only if  $R \geq \frac{2(xy-4c)}{xy^2(1-y)}$ . If  $R < \frac{2(xy-4c)}{xy^2(1-y)}$ , the boundary solution of  $k^* = \frac{xy-4c}{xy}$  holds. We further consider the following sub-conditions.

b.1) If  $R \geq \frac{2}{y(1-y)}$ : the researcher's optimal effort is  $k^* = 1$ , leading to payoff of  $\Gamma_{nb}^* = yR - 1$  and firm profit of  $\pi_{nb}^* = \frac{1}{4}(1 + xy - 4cy)$ . The researcher's payoff is always lower than her payoff in a).

b.2) If  $\frac{2(xy-4c)}{xy^2(1-y)} \leq R < \frac{2}{y(1-y)}$ : the researcher's optimal effort is  $k^* = \frac{R(1-y)y}{2}$ , leading to payoff of  $\Gamma_{nb}^* = \frac{1}{4}Ry^2(R(y-1)^2 + 4)$  and firm profit of  $\pi_{nb}^* = \frac{1}{4}(1 + xy^2 - 4cy + \frac{1}{2}Rxy^2(1-y)^2)$ . The researcher's payoff is always lower than her payoff in a).

b.3) If  $R < \frac{2(xy-4c)}{xy^2(1-y)}$ : the researcher's optimal effort is the boundary solution  $k^* = \frac{xy-4c}{xy}$ , leading to payoff of  $\Gamma_{nb}^* = -\frac{16c^2}{x^2y^2} + \frac{4c(R(y-1)y+2)}{xy} + Ry - 1$  and firm profit of  $\pi_{nb}^* = \frac{1}{4}(1 + xy - 4c)$ . The researcher's payoff is always lower than her payoff in a).

Therefore, when  $xy > 4c$ , the researcher's optimal decision is always to set  $k^* = 0$ .

c) If  $xy < 4c$  &  $0 \leq k < \frac{4c-xy}{x(1-y)}$ , the firm never invests, that is,  $Pr_{nb}(I) = 0$ . The researcher's expected payoff is  $\Gamma_{nb} = -k^2$ . The optimal effort is thus  $k^* = 0$ , leading to maximized payoff of  $\Gamma_{nb}^* = 0$  and firm profit of  $\pi_{nb}^* = \frac{1}{4}$ .

d) If  $xy < 4c$  &  $\frac{4c-xy}{x(1-y)} \leq k \leq 1$ , the firm invests only upon receiving  $sig = H$ , that is,  $Pr_{nb}(I) = Pr(sig = H) = y$ . The researcher's expected payoff is  $\Gamma_{nb} = (k + (1 - k)y)yR - k^2$ , which is

maximized at interior solution  $k^* = \min\{1, \frac{R(1-y)y}{2}\}$ . This interior solution is valid only if  $R > \frac{8c-2xy}{xy^3-2xy^2+xy}$ . If  $R < \frac{8c-2xy}{xy^3-2xy^2+xy}$ , the boundary solution of  $k^* = \frac{4c-xy}{x(1-y)}$  holds. We further consider the following sub-conditions.

d.1) If  $R \geq \frac{2}{y(1-y)}$ , the researcher's optimal effort is  $k^* = 1$ , leading to payoff of  $\Gamma_{nb}^* = yR - 1$  and firm profit of  $\pi_{nb}^* = \frac{1}{4}(-4cy + xy + 1)$ . The researcher's payoff is always greater than her payoff in c).

d.2) If  $\frac{8c-2xy}{xy^3-2xy^2+xy} \leq R < \frac{2}{y(1-y)}$ , the researcher's optimal effort is  $k^* = \frac{R(1-y)y}{2}$ , which leads to her maximized payoff of  $\Gamma_{nb}^* = \frac{1}{4}Ry^2(R(y-1)^2 + 4)$  and firm profit of  $\pi_{nb}^* = \frac{1}{4}(-4cy + xy^2(2R(y-1)^2 + 1) + 1)$ . The researcher's payoff is always greater than her payoff in c).

d.3) If  $R < \frac{8c-2xy}{xy^3-2xy^2+xy}$ , the researcher's optimal effort is the boundary solution  $k^* = \frac{4c-xy}{x(1-y)}$ , leading to payoff of  $\Gamma_{nb}^* = \frac{-16c^2+4cxy(R(y-1)^2+2)-x^2y^2}{x^2(y-1)^2}$  and firm profit of  $\pi_{nb}^* = \frac{1}{4}$ . The researcher's payoff is greater than her payoff in c) if  $R > R_{nb} = \frac{(xy-4c)^2}{4cx(y-1)^2y}$  and lower than her payoff in c) if  $R < R_{nb}$ .

Therefore, when  $xy < 4c$ , the researcher makes an effort  $k^* = 0$  if  $R < R_{nb} = \frac{(xy-4c)^2}{4cx(y-1)^2y}$  and makes an effort of  $k^* = \max\{\frac{4c-xy}{x(1-y)}, \min\{1, \frac{R(1-y)y}{2}\}\}$  if  $R > R_{nb}$ .

### **Punishment-oriented culture ( $R = 0 \& N > 0$ )**

We consider the following conditions.

a) If  $xy > 4c \& 0 \leq k < \frac{xy-4c}{xy}$ , the firm always invests, that is,  $Pr_{nb}(I) = 1$ . The researcher's expected payoff is  $\Gamma_{nb} = -(1-y)N - k^2$ . The optimal effort level is  $k_{nb}^* = 0$ , which leads to researcher payoff of  $\Gamma_{nb}^* = -(1-y)N$  and firm profit of  $\pi_{nb}^* = \frac{1}{4}(1 + xy - 4c)$ .

b) If  $xy > 4c \& k \geq \frac{xy-4c}{xy}$ , the firm invests only upon receiving  $sig = H$ , that is,  $Pr_{nb}(I) = y$ . The researcher's expected payoff is  $\Gamma_{nb} = -(1-k)(1-y)yN - k^2$ , which is maximized at interior solution  $k^* = \min\{1, \frac{N(1-y)y}{2}\}$ . Note that this interior solution is valid only if

$N \geq \frac{2(xy-4c)}{xy^2(1-y)}$ . If  $N < \frac{2(xy-4c)}{xy^2(1-y)}$ , the boundary solution of  $k^* = \frac{xy-4c}{xy}$  holds. We further consider the following sub-conditions.

b.1) If  $N \geq \frac{2}{y(1-y)}$ : the researcher's optimal effort is  $k^* = 1$ , leading to payoff of  $\Gamma_{nb}^* = -1$  and firm profit of  $\pi_{nb}^* = \frac{1}{4}(1 + xy - 4cy)$ . The researcher's payoff is always higher than her payoff in a).

b.2) If  $\frac{2(xy-4c)}{xy^2(1-y)} \leq N < \frac{2}{y(1-y)}$ : the researcher's optimal effort is  $k^* = \frac{N(1-y)y}{2}$ , leading to payoff of  $\Gamma_{nb}^* = \frac{1}{4}N(y-1)y(N(y-1)y+4)$  and firm profit of  $\pi_{nb}^* = \frac{1}{4}(1 + xy^2 - 4cy + \frac{1}{2}Nxy^2(1-y)^2)$ . The researcher's payoff is always higher than her payoff in a).

b.3) If  $N < \frac{2(xy-4c)}{xy^2(1-y)}$ : the researcher's optimal effort is the boundary solution  $k^* = \frac{xy-4c}{xy}$ , leading to payoff of  $\Gamma_{nb}^* = -\frac{16c^2}{x^2y^2} + \frac{4c(N(y-1)y+2)}{xy} - 1$  and firm profit of  $\pi_{nb}^* = \frac{1}{4}(1 + xy - 4c)$ . The researcher's payoff is greater than her payoff in a) if  $N_{nb}^* = \frac{(xy-4c)^2}{x(y-1)y^2(4c-x)} < N < \frac{2(xy-4c)}{xy^2(1-y)}$  but lower than her payoff in a) if  $N < N_{nb}^*$ .

Therefore, when  $xy > 4c$ , the researcher's optimal decision is to set  $k^* = 0$  if  $N < N_{nb}^* = \frac{(xy-4c)^2}{x(y-1)y^2(4c-x)}$  and  $k^* = \max\{\frac{xy-4c}{xy}, \min\{1, \frac{Ny(1-y)}{2}\}\}$  if  $N > N_{nb}^* = \frac{(xy-4c)^2}{x(y-1)y^2(4c-x)}$ .

c) If  $xy < 4c$  &  $0 \leq k < \frac{4c-xy}{x(1-y)}$ , the firm never invests, that is,  $Pr_{nb}(I) = 0$ . The researcher's payoff is  $\Gamma_{nb} = k^2$ . The researcher's optimal effort is  $k^* = 0$ , leading to maximized payoff of  $\Gamma_{nb}^* = 0$  and firm profit of  $\pi_{nb}^* = \frac{1}{4}$ .

d) If  $xy < 4c$  &  $\frac{4c-xy}{x(1-y)} \leq k \leq 1$ , the firm invests only upon receiving  $sig = H$ , that is,  $Pr_{nb}(I) = y$ . The researcher's expected payoff is  $\Gamma_{nb} = -(1-k)(1-y)yN - k^2$ , which is maximized at interior solution  $k^* = \min\{1, \frac{N(1-y)y}{2}\}$ . This interior solution is valid only if  $N > \frac{8c-2xy}{xy^3-2xy^2+xy}$ .

If  $N < \frac{8c-2xy}{xy^3-2xy^2+xy}$ , the boundary solution of  $k^* = \frac{4c-xy}{x(1-y)}$  holds. We further consider the following sub-conditions.

d.1) If  $N \geq \frac{2}{y(1-y)}$ , the researcher's optimal effort is  $k^* = 1$ , leading to payoff of  $\Gamma_{nb}^* = -1$  and firm profit of  $\pi_{nb}^* = \frac{1}{4}(-4cy + xy + 1)$ . The researcher's payoff is always lower than her payoff in c).

d.2) If  $\frac{8c-2xy}{xy^3-2xy^2+xy} \leq N < \frac{2}{y(1-y)}$ , the researcher's optimal effort is  $k^* = \frac{(R+N)(1-y)y}{2}$ , which leads to her maximized payoff of  $\Gamma_{nb}^* = \frac{1}{4}N(y-1)y(N(y-1)y+4)$  and firm profit of  $\pi_{nb}^* = \frac{1}{4}(-4cy + xy^2 + 1)$ . The researcher's payoff is always lower than her payoff in c).

d.3) If  $N < \frac{8c-2xy}{xy^3-2xy^2+xy}$ , the researcher's optimal effort is the boundary solution  $k^* = \frac{4c-xy}{x(1-y)}$ , leading to payoff of  $\Gamma_{nb}^* = \frac{-16c^2+4cxy(N(y-1)^2+2)-x^2y(N(y-1)^2+y)}{x^2(y-1)^2}$  and firm profit of  $\pi_{nb}^* = \frac{1}{4}$ . The researcher's payoff is always lower than her payoff in c).

Therefore, when  $xy < 4c$ , the researcher makes no effort,  $k^* = 0$ .

Summarizing the cases of reward-oriented culture and punishment-oriented culture, we summarize the equilibrium results in the case of no research bias below.

REMARK 1. When there is no research bias:

- When  $xy > 4c$ : If  $R > 0 \& N = 0$  or if  $R = 0 \& N < N_{nb} = \frac{(xy-4c)^2}{x(y-1)y^2(4c-x)}$ :  $k^* = 0$ ,  $Pr(I) = 1$ , and  $\pi_{nb}^* = \frac{1}{4}(1 + xy - 4c)$ . If  $R = 0 \& N > N_{nb}$ ,  $k^* = \max\{\frac{xy-4c}{xy}, \min\{1, \frac{Ny(1-y)}{2}\}\}$ ,  $Pr(I) = y$ , and  $\pi_{nb}^* = \frac{1}{4}(1 + xy^2 + k^*xy(1-y) - 4cy)$ .

- when  $xy < 4c$ : If  $R < R_{nb} = \frac{(xy-4c)^2}{4cx(y-1)^2y} \& N = 0$  or if  $R = 0 \& N > 0$ ,  $k^* = 0$ ,  $Pr(I) = 0$ , and  $\pi_{nb}^* = \frac{1}{4}$ . If  $R > R_{nb} = \frac{(xy-4c)^2}{4cx(y-1)^2y} \& N = 0$ ,  $k^* = \max\{\frac{4c-xy}{x(1-y)}, \min\{1, \frac{Ry(1-y)}{2}\}\}$ ,  $Pr(I) = y$ , and  $\pi_{nb}^* = \frac{1}{4}(1 + xy^2 + k^*xy(1-y) - 4cy)$ .

## 2. Proof of results in the research bias-against case

From conditional probabilities as specified in Table 1, we obtain  $Pr(sig = H) = Pr(sig = H|H)Pr(H) + Pr(sig = H|L)Pr(L) = (k + y - ky)y$ . By Bayes Rule, we have

$$Pr(H|sig = H) = \frac{Pr(sig = H|H)Pr(H)}{Pr(sig = H)} = 1; \quad (7)$$

$$Pr(H|sig = L) = \frac{Pr(sig = L|H)Pr(H)}{Pr(sig = L)} = \frac{(1-k)(1-y)y}{1-(k+y-ky)y}. \quad (8)$$

Equation (7) suggests that when a research bias-against renders a signal  $sig = H$  that suggests investing is profitable, the firm has full faith that the investment will be profitable.

Upon receiving  $sig = L$ , the firm's expected profit from investing is

$$Pr(H|sig = L)\frac{1+x}{4} + Pr(L|sig = L)\frac{1}{4} - c = \frac{c(4 - 4(k-1)y) + (k-1)(x+1)y - 1}{4(k-1)y - 4}, \quad (9)$$

which exceeds the firm's profit from not investing if  $xy > 4c + 4cy$  &  $k < \bar{k}_{bg} = \frac{4cy+4c-xy}{4cy-xy}$ . We

derive the firm's investment decision in the following conditions.

a) If  $xy > 4c + 4cy$  &  $0 \leq k < \bar{k}_{bg}$ , the firm always invests, that is,  $Pr_{bg}(I) = 1$ . In this case, the firm's realizes a high demand with probability  $Pr(H) = y$ . The firm's expected profit is thus  $\pi_{bg} = y\frac{1+x}{4} + (1-y)\frac{1}{4} - c = \frac{1}{4}(1 + xy - 4c)$ .

b) If  $xy > 4c + 4cy$  &  $\bar{k}_{bg} \leq k \leq 1$ , the firm invests only if receiving  $sig = H$ . The firm's investment probability is  $Pr_{bg}(I) = Pr(sig = H) = (k + y - ky)y < y$ . Note that the firm always realizes a high demand when it invests upon receiving  $sig = H$ . We thus derive the firm's expected profit as  $\pi_{bg} = (k + y - ky)y(\frac{1+x}{4} - c) + (1 - (k + y - ky)y)\frac{1}{4} = \frac{1}{4}(4cy(k(y-1) - y) - kx(y-1)y + xy^2 + 1)$ . This profit increases with  $k$ .

c) If  $xy < 4c + 4cy$ , the firm invests only if receiving  $sig = H$ . The firm's investment probability and expected product are the same as in b).

Summarizing the above we obtain the firm's profit function as below.

$$\pi_{bg}(k) = \begin{cases} y\frac{1+x}{4} + (1-y)\frac{1}{4} - c = \frac{1}{4}(1 + xy - 4c) & \text{if } xy > 4c(1+y) \text{ \& } k < \bar{k}_{bg} = \frac{4cy+4c-xy}{4cy-xy} \\ (k + y - ky)y(\frac{1+x}{4} - c) + (1 - (k + y - ky)y)\frac{1}{4} & \text{if } \quad \quad \quad \textit{otherwise.} \end{cases} \quad (10)$$

Anticipating the firm's investment strategy, the researcher chooses the optimal effort level to maximize her payoff function, as given below

$$\Gamma_{bg}(k) = \begin{cases} yR - (1-y)N - k^2 & \text{if } xy > 4c(1+y) \text{ \& } k < \bar{k}_{bg} = \frac{4cy+4c-xy}{4cy-xy} \\ (k + y - ky)yR - k^2 & \text{if } \quad \quad \quad \textit{otherwise} \end{cases} \quad (11)$$

We solve the researcher's optimal effort decision by considering the reward-oriented culture and the punishment-oriented culture separately.

### Reward-oriented culture ( $R > 0 \& N = 0$ )

We consider the following conditions.

- a) If  $xy < 4c + 4cy$ , the researcher's optimal effort can be derived as  $k^* = \min\{1, \frac{1}{2}(1 - y)yR\}$ , which leads to researcher payoff of  $\Gamma_{bg}^* = \min\{yR - 1, y^2R + \frac{1}{4}(1 - y)^2y^2R\}$  and firm profit of  $\pi_{bg}^* = \min\{\frac{1}{4}(-4cy + xy + 1), \frac{1}{8}(-4cy^2(R(y - 1)^2 + 2) + xy^2(R(y - 1)^2 + 2) + 2)\}$ .
- b) If  $xy > 4c + 4cy \& k < \bar{k}_{bg}$ , the researcher's optimal effort is  $k^* = 0$ , leading to payoff of  $\Gamma_{bg}^* = yR$  and firm profit of  $\pi_{bg}^* = \frac{1}{4}(1 + xy - 4c)$ .
- c) If  $xy > 4c + 4cy \& k > \bar{k}_{bg}$ , the researcher's optimal effort is  $k^* = \min\{1, \frac{1}{2}(1 - y)yR\}$ . We further consider the following sub-conditions.

c.1) If  $R \leq \frac{2}{(1-y)y}$ , the researcher's optimal effort is  $k^* = 1$ , leading to payoff of  $\Gamma_{bg}^* = yR - 1$ . This payoff is always lower than her payoff in b).

c.2) If  $\frac{2(4cy+4c-xy)}{(4cy-xy)(1-y)y} \geq R < \frac{2}{(1-y)y}$ , the researcher's optimal effort is  $k^* = \frac{1}{2}y(1 - y)R$ , leading to payoff of  $\Gamma_{bg}^* = \frac{1}{4}Ry^2(R(y - 1)^2 + 4)$ . This payoff is always lower than her payoff in b).

c.3) If  $R < \frac{2(4cy+4c-xy)}{(4cy-xy)(1-y)y}$ , the researcher's optimal effort is  $k^* = \bar{k}_{bg} = \frac{4cy+4c-xy}{4cy-xy}$ , leading to payoff of  $\Gamma_{bg}^* = \frac{16c^2((R-1)y^2-2y-1)-4cxy(y+1)(Ry-2)+x^2y^2(Ry-1)}{y^2(x-4c)^2}$ . This payoff is always lower than her payoff in b).

Summarizing conditions b)-c), we obtain that when  $xy > 4c + 4cy$ , the researcher's optimal effort is  $k^* = 0$ .

### Punishment-oriented culture ( $R = 0 \& N > 0$ )

We consider the following conditions.

- a) If  $xy < 4c + 4cy$ , the researcher optimally makes zero effort  $k^* = 0$ , leading to zero payoff  $\Gamma_{bg}^* = 0$  and firm profit of  $\pi_{bg}^* = \frac{1}{4}(1 + xy^2 - 4cy^2)$ .

b) If  $xy > 4c + 4cy$ , we consider the following sub-conditions.

b.1) If  $xy > 4c + 4cy$  &  $k < \bar{k}_{bg}$ : the researcher's optimal effort is  $k^* = 0$ , which leads to researcher payoff of  $\Gamma_{bg}^* = -(1 - y)N$ , firm investment probability of  $Pr_{bg}(I) = 1$ , and firm profit of  $\pi_{bg}^* = \frac{1}{4}(1 + xy - 4c)$ .

b.2) If  $xy > 4c + 4cy$  &  $k \geq \bar{k}_{bg}$ : the researchers' optimal effort is  $k^* = \bar{k}_{bg} = \frac{4cy + 4c - xy}{4cy - xy}$ , which leads to researcher payoff  $\Gamma_{bg}^* = -(\frac{4cy + 4c - xy}{4cy - xy})^2$ , firm investment probability of  $Pr_{bg}(I) = \frac{4c - xy}{4c - x} < y$ , and firm profit  $\pi_{bg}^* = \frac{1}{4}(1 + xy - 4c)$ .

It can be proven that the researcher profit in b.1) is greater than in b.2) if  $N < N_{bg} = (\frac{4cy + 4c - xy}{4cy - xy})^2 \frac{1}{1 - y}$  and lower than in b.2) if  $N > N_{bg}$ .

Summarizing the cases of reward-oriented culture and punishment-oriented culture, we summarize the equilibrium results in the case of research bias-against below.

REMARK 2. When there is a research bias-against,

- When  $xy > 4c + 4cy$ : If  $R > 0$  &  $N = 0$  or if  $R = 0$  &  $N < N_{bg}^* = (\frac{4cy + 4c - xy}{4cy - xy})^2 \frac{1}{1 - y}$ ,  $k^* = 0$ ,  $Pr(I) = 1$ , and  $\pi_{bg}^* = \frac{1}{4}(1 + xy - 4c)$ . If  $R = 0$  &  $N > N_{bg}$ ,  $k^* = \frac{4cy + 4c - xy}{4cy - xy}$ ,  $Pr_{bg}(I) = \frac{4c - xy}{4c - x} < y$ , and  $\pi_{bg}^* = \frac{1}{4}(1 + xy - 4c)$ .

- When  $xy < 4c + 4cy$ : If  $R > 0$  &  $N = 0$ ,  $k^* = \min\{1, \frac{1}{2}(1 - y)yR\} > 0$ ,  $Pr(I) = (k^*(1 - y) + y)y < y$ ,  $\pi_{bg}^* = \frac{1}{4}(1 + xy^2 - 4cy^2) + k^*\frac{1}{4}(1 - y)y(x - 4c)$ . If  $R = 0$  &  $N > 0$ ,  $k^* = 0$ ,  $Pr(I) = y^2$ , and  $\pi_{bg}^* = \frac{1}{4}(1 + xy^2 - 4cy^2)$ .

## Proof of Proposition 1

We consider the two cultures separately.

**Reward-oriented culture** ( $R > 0$  &  $N = 0$ ).

We consider the following conditions.

a) If  $xy > 4c + 4cy$ :  $Pr_{nb}(I) = Pr_{bg}(I) = 1$ .

b) If  $4c < xy < 4c + 4cy$ :  $Pr_{nb}(I) = 1 > Pr_{bg}(I) = (k + y - ky)y$ .

c) If  $xy < 4c$ : We further consider the following sub-conditions.

c.1) If  $R < R_{nb}$ :  $Pr_{nb}(I) = 0 < Pr_{bg}(I) = (k + y - ky)y$ .

c.2) If  $R \geq R_{nb}$ :  $Pr_{nb}(I) = y > Pr_{bg}(I) = (k + y - ky)y$ ;  $k_{nb} = \frac{Ry(1-y)}{2} = k_{bg}$ .

Summarizing the above, we obtain that the firm invests with a greater probability with a research bias-against than with no bias in the research if  $xy < 4c$  &  $R < R_{nb}$ .

**Punishment culture** ( $R = 0$  &  $N > 0$ ).

We consider the following conditions.

a) If  $xy > 4c + 4cy$ : It can be proven that  $N_{bg} - N_{nb} = \frac{4c(-16c^2 - 4cxy^2 + x^2y^2)}{x(y-1)y^2(x-4c)^2} < 0$ . We further consider the following sub-conditions.

a.1) If  $N < N_{bg}$ :  $k_{nb} = k_{bg} = 0$ ;  $Pr_{nb}(I) = Pr_{bg}(I) = 1$ .

a.2) If  $N_{bg} \leq N < N_{nb}$ :  $k_{nb} = 0 < k_{bg}$ ;  $Pr_{nb}(I) = 1 > Pr_{bg}(I)$ .

a.3) If  $N \geq N_{nb}$ :  $Pr_{nb}(I) = y > Pr_{bg}(I)$ .

b) If  $4c < xy < 4c + 4cy$ : We further consider the following sub-conditions.

b.1) If  $N < N_{nb}$ :  $k_{nb} = k_{bg} = 0$ ;  $Pr_{nb}(I) = 1 > Pr_{bg}(I) = y^2$ .

b.2) If  $N \geq N_{nb}$ :  $k_{nb} = \frac{Ny(1-y)}{2} > k_{bg} = 0$ ;  $Pr_{nb}(I) = y > Pr_{bg}(I) = y^2$ .

c) If  $xy < 4c$ :  $Pr_{nb}(I) = 0 < Pr_{bg}(I) = y^2$ .

Summarizing the above, we obtain that the firm invests with a greater probability with a research bias-against than with unbiased research if  $xy < 4c$  in a punishment oriented culture.

## Proof of Proposition 2

We consider the following conditions of the bias-against case.

a) If  $xy > 4c + 4cy$ : The firm profit is always  $\frac{1}{4}(1 + xy - 4c)$ , in the reward-oriented and the punishment-oriented culture.

b) If  $xy < 4c + 4cy$ : It can be proven that the firm's profit in the reward culture is always greater than the firm profit in the punishment culture by  $k_{bg}^* \frac{1}{4}(1-y)y(x-4c)$ , where  $k_{bg}^* = \min\{1, \frac{1}{2}(1-y)yR\} > 0$ .

### 3. Proof of results in the case of research bias-in-favor

From conditional probabilities as specified in Table 1, we obtain  $Pr(sig = H) = Pr(sig = H|H)Pr(H) + Pr(sig = H|L)Pr(L) = y + (1-k)y(1-y)$ . Using Bayes Rule, we obtain

$$Pr(H|sig = H) = \frac{Pr(sig = H|H)Pr(H)}{Pr(sig = H)} = \frac{y}{y + (1-k)y(1-y)}; \quad (12)$$

$$Pr(H|sig = L) = \frac{Pr(sig = L|H)Pr(H)}{Pr(sig = L)} = 0. \quad (13)$$

Equation (12) allows us to derive the firm's profit from investing in inclusive product design when the researcher produces  $sig = H$  as  $Pr(H|sig = H)(\frac{1+x}{4}) + Pr(L|sig = H)(\frac{1}{4}) - c = \frac{4c(k(-y)+k+y-2)+k(y-1)+x-y+2}{4k(y-1)-4y+8}$ . This profit is greater than that from not investing (i.e.,  $\frac{1}{4}$ ) if  $4c < x \leq 8c - 4cy$  &  $k \geq \underline{k}_{for} = \frac{4cy-8c+x}{4cy-4c}$  or if  $x > 8c - 4cy$ . Equation (13) suggests that upon receiving  $sig = L$  from a bias-in-favor researcher, the firm has no chance to profit from investing in inclusive design.

We consider the following conditions in deriving the firm's optimal investment decision.

a) If  $4c < x \leq 8c - 4cy$  &  $0 \leq k < \underline{k}_{for} = \frac{4cy-8c+x}{4cy-4c}$ , the firm never makes the investment, that is,  $Pr_{bf}(I) = 0$ . The firm's profit is  $\pi_{bf} = \frac{1}{4}$ .

b) In all other conditions, the firm makes investment only upon receiving  $sig = H$  (note that  $x > 4c$  by assumption). The firm's investment probability is  $Pr_{bf}(I) = y + (1-k)y(1-y)$ , which decreases with  $k$  but remains greater than  $y$ . Conditional on investing, the probability for the demand to realize as high and low are  $Pr(H|sig = H) = \frac{y}{y+(1-k)y(1-y)}$  and  $Pr(L|sig = H) = \frac{(1-k)y(1-y)}{y+(1-k)y(1-y)}$ , respectively. The firm profit can be derived as  $\pi_{bf} =$

$Pr(sig = H)(Pr(H|sig = H)\frac{1+x}{4} + Pr(L|sig = H)\frac{1}{4} - c) + Pr(sig = L)\frac{1}{4} = cy(k(-y) + k + y - 2) + \frac{1}{4}(xy + 1)$ . We obtain the firm's profit function as follows.

$$\pi_{bf}(k) = \begin{cases} \frac{1}{4} & \text{if } 4c < x \leq 8c - 4cy \& k < \underline{k}_{for} = \frac{4cy - 8c + x}{4cy - 4c} \\ y(\frac{1+x}{4} - c) + (1-k)y(1-y)(\frac{1}{4} - c) \\ + (1-y - (1-k)y(1-y))\frac{1}{4} & \text{if } \quad \quad \quad \textit{otherwise} \\ = \frac{1}{4}(1 + xy - 4cy(2-y)) - cyk(1-y) & \end{cases} \quad (14)$$

Anticipating the firm's investment decision, the researcher chooses the optimal effort level to maximize its payoff

$$\Gamma_{bf}(k) = \begin{cases} -k^2 & \text{if } 4c < x \leq 8c - 4cy \& k < \underline{k}_{for} = \frac{4cy - 8c + x}{4cy - 4c} \\ yR - (1-k)y(1-y)N - k^2 & \text{if } \quad \quad \quad \textit{otherwise} \end{cases} \quad (15)$$

We solve the researcher's optimal effort decision by considering the two cultures separately.

### Reward-oriented culture ( $R > 0 \& N = 0$ ).

We consider the following conditions.

a) If  $x \leq 8c - 4cy$ , we consider the following sub-conditions.

a.1)  $x \leq 8c - 4cy \& k < \underline{k}_{for} = \frac{4cy - 8c + x}{4cy - 4c}$ : the researcher's optimal effort level is  $k^* = 0$ , which leads to zero payoff  $\Gamma_{bf}^* = 0$ , firm investment probability of  $Pr(I) = 0$ , and firm profit of  $\pi_{bf}^* = \frac{1}{4}$ .

a.2)  $x \leq 8c - 4cy \& k \geq \underline{k}_{for}$ : the researcher's optimal effort level is  $k^* \underline{k}_{for} = \frac{4cy - 8c + x}{4cy - 4c}$ , which leads to payoff of  $\Gamma_{bf}^* = yR - (\frac{4cy - 8c + x}{4cy - 4c})^2$ , firm investment probability of  $Pr_{bf}(I) = \frac{xy}{4c} > y$ , and firm profit of  $\pi - bf^* = \frac{1}{4}$ .

It can be proven that the researcher's payoff in a.1) is greater than in a.2) if  $R < R_{bf} = \frac{(4cy - 8c + x)^2}{y(4cy - 4c)^2}$  and lower than in a.2) if  $R > R_{bf}$ .

b) If  $x > 8c - 4cy$ , the researcher's optimal effort level is  $k^* = 0$ , which leads to payoff of  $\Gamma_{bf} = yR$ , firm investment probability of  $Pr_{bf}(I) = y(2 - y)$ , and firm profit of  $\pi_{bf}^* = cy(y - 2) + \frac{1}{4}(xy + 1)$ .

**Punishment-oriented culture** ( $R = 0 \& N > 0$ ). We consider the following conditions.

a) If  $x > 8c - 4cy$ , the researcher's optimal effort is  $k^* = \min\{1, \frac{Ny(1-y)}{2}\}$ , which leads to payoff of  $\Gamma_{bf} = \min\{-1, \frac{1}{4}N(y-1)y(N(y-1)y+4)\}$ , firm investment probability of  $Pr_{bf}(I) = \min\{y, y + (1 - \frac{Ny(1-y)}{2})y(1-y)\}$ , and firm profit of  $\pi_{bf}^* = \min\{\frac{1}{4}(-4cy + xy + 1), \frac{1}{4}(2cy(Ny^3 - 2Ny^2 + (N+2)y - 4) + xy + 1)\}$ .

b) If  $x \leq 8c - 4cy \& 0 \leq k < \underline{k}_{for}$  the researcher's optimal effort is  $k^* = 0$ , leading to zero payoff  $\Gamma_{bf}^* = 0$ , firm investment probability of  $Pr_{bf}(I) = 0$ , and firm profit of  $\Pi_{bf}^* = \frac{1}{4}$ .

c) If  $x \leq 8c - 4cy \& \underline{k}_{for} \leq k \leq 1$  the interior solution of  $k$  is  $k^* = \min\{1, \frac{Ny(1-y)}{2}\}$ . This interior solution holds only if  $N > \frac{-4cy+8c-x}{2cy^3-4cy^2+2cy}$ . Otherwise, the boundary solution  $\underline{k}_{bf}$  holds.

We further consider the following sub-conditions.

c.1) If  $N \geq \frac{2}{y(1-y)}$ , the researcher's optimal effort is  $k^* = 1$ , leading to payoff of  $\Gamma_{bf}^* = -1$ ; this payoff is always lower than her payoff in b).

c.2) If  $\frac{-4cy+8c-x}{2cy^3-4cy^2+2cy} \leq N < \frac{2}{y(1-y)}$ , the researcher's optimal effort  $k^* = \frac{Ny(1-y)}{2}$ , leading to payoff of  $\Gamma_{bf}^* = \frac{1}{4}N(y-1)y(N(y-1)y+4)$ . This payoff is always lower than her payoff in b).

c.3) If  $N < \frac{-4cy+8c-x}{2cy^3-4cy^2+2cy}$ , the researcher's optimal effort is  $k^* = \frac{4cy-8c+x}{4cy-4c}$ , leading to payoff of  $\Gamma_{bf}^* = N(y-1)y \left(1 - \frac{4cy-8c+x}{4cy-4c}\right) - \frac{(4cy-8c+x)^2}{(4cy-4c)^2}$ . This payoff is always lower than her payoff in b).

Summarizing b) and c), we obtain that when  $x \leq 8c - 4cy$ , the researcher' optimal effort is  $k^* = 0$ .

Summarizing the cases of reward-oriented culture and punishment-oriented culture, we obtain the equilibrium results in case of research bias in-favor.

REMARK 3. When there is a research bias-in-favor,

- When  $xy > 4c(2-y)y$ : If  $R > 0 \& N = 0$ ,  $k^* = 0$ ,  $Pr(I) = y(2-y) > y$ , and  $\pi_{bf}^* = \frac{1}{4}(1 + xy - 4cy(2-y))$ . If  $R = 0 \& N > 0$ ,  $k^* = \min\{1, \frac{Ny(1-y)}{2}\}$ ,  $Pr(I) = y(1 + (1-k^*)(1-y)) > y$ , and  $\pi_{bf}^* = \frac{1}{4}(1 + xy - 4c(2-y)y) + k^*c(1-y)y$ .

- When  $xy < 4c(2-y)y$ : If  $R < R_{bf} = \frac{1}{y}(\frac{4cy-8c+x}{4cy-4c})^2 \& N = 0$  or if  $R = 0 \& N > 0$ ,  $k^* = 0$ ,  $Pr(I) = 0$ , and  $\pi_{bf}^* = \frac{1}{4}$ . If  $R > R_{bf} \& N = 0$ ,  $k^* = \frac{4cy-8c+x}{4cy-4c}$ ,  $Pr(I) = y(1 + (1-k^*)(1-y)) = \frac{xy}{4c} > y$ , and  $\pi_{bf}^* = \frac{1}{4}$ .

### Proof of Proposition 3

We consider the two cultures separately.

#### Reward-oriented culture.

We consider the following conditions.

a) If  $xy > 4c$ :  $k_{nb} = k_{bf} = 0$ ;  $Pr_{nb}(I) = 1 > Pr_{bf}(I) = (2-y)y$ .

b) If  $4c(2-y)y < xy < 4c$ : We further consider the following sub-conditions.

b.1) If  $R < R_{nb}$ :  $k_{nb} = k_{bf} = 0$ ;  $Pr_{nb}(I) = 0 < Pr_{bf}(I) = (2-y)y$ .

b.2) If  $R \geq R_{nb}$ :  $k_{nb} > k_{bf} = 0$ ;  $Pr_{nb}(I) = y < Pr_{bf}(I) = (2-y)y$ .

c) If  $xy < 4c(2-y)y$ : It can be proven that  $R_{nb} = \frac{(xy-4c)^2}{4cx(y-1)^2y} > R_{bf} = \frac{(4cy-8c+x)^2}{y(4cy-4c)^2}$ . We further consider the following sub-conditions.

c.1) If  $R \geq R_{nb}$ :  $Pr_{nb}(I) = y < Pr_{bf}(I) = \frac{xy}{4c}$ .

c.2) If  $R_{bf} \leq R < R_{nb}$ :  $k_{nb} = 0 < k_{bf}$ ;  $Pr_{nb}(I) = 0 < Pr_{bf}(I)$ .

c.3) If  $R < R_{bf}$ :  $k_{nb} = k_{bf} = 0$ ;  $Pr_{nb}(I) = Pr_{bf}(I) = 0$ .

Summarizing the above we obtain the the firm invests with a lower probability by using a biased-in-favor researcher than an unbiased researcher if  $xy > 4c$ .

#### Punishment-oriented culture.

We consider the following conditions.

a) If  $xy > 4c$ : We further consider the following subconditions.

a.1) If  $N < N_{nb}$ :  $Pr_{nb}(I) = 1 > Pr_{bf}(I) = y + (1 - k)y(1 - y)$ .

a.2) If  $N \geq N_{nb}$ :  $Pr_{nb}(I) = y < Pr_{bf}(I) = y + (1 - k)y(1 - y)$ .

b) If  $4c(2 - y)y < xy < 4c$   $k_{nb} = 0 < k_{bf}$ ;  $Pr_{nb}(I) = 0 < Pr_{bf}(I) = y + (1 - k)y(1 - y)$ .

c) If  $xy < 4c(2 - y)y$   $k_{nb} = k_{bf} = 0$ ;  $Pr_{nb}(I) = Pr_{bf}(I) = 0$ .

Summarizing the above we obtain that the firm invests with a lower probability by using a biased-in-favor researcher than an unbiased researcher if  $xy > 4c$  &  $N < N_{nb}$ .

### Proof of Proposition 4

We consider the following conditions.

a) If  $xy > 4c(2 - y)y$ : The firm profit in the punishment culture is greater than its profit in the reward culture by  $k_{bf}^*c(1 - y)y$  where  $k_{bf}^* = \min\{1, \frac{Ny(1-y)}{2}\} > 0$ .

b) If  $xy < 4c(2 - y)y$ : The firm obtains the same profit under both cultures.

### Proof of Proposition 5

We consider the two cultures separately.

#### Reward-oriented culture.

We consider the following conditions.

a) If  $xy > 4c + 4cy$ :  $Pr_{bg}(I) = 1 > Pr_{bf}(I) = (2 - y)y$ ;  $\pi_{bg}^* = \frac{1}{4}(1 + xy - 4c) < \pi_{bf}^* = \frac{1}{4}(1 + xy - 4cy(2 - y))$ .

b) If  $4cy(2 - y) < xy < 4c + 4cy$ :  $Pr_{bg}(I) < y < Pr_{bf}(I) = (2 - y)y$ ;  $\pi_{bg}^* = \frac{1}{4}(1 + xy^2 - 4cy^2) + k_{bg}^*\frac{1}{4}(1 - y)y(x - 4c) > \pi_{bf}^* = \frac{1}{4}(1 + xy - 4cy(2 - y))$  if  $k_{bg}^* > \frac{8c-x}{4c-x}$ , that is, if  $R > \frac{2(8c-x)}{(4c-x)y(1-y)}$ .

c) If  $xy < 4cy(2 - y)$ : We further consider the following subconditions.

c.1) If  $R < R_{bf}$ :  $Pr_{bg}(I) > Pr_{bf}(I) = 0$ ;  $\pi_{bg}^* = \frac{1}{4}(1 + xy^2 - 4cy^2) + k_{bg}^*\frac{1}{4}(1 - y)y(x - 4c) > \pi_{bf}^* = \frac{1}{4}(x - 4c)y^2$ .

c.2) If  $R \geq R_{bf}$ :  $Pr_{bg}(I) < y < Pr_{bf}(I)$ ;  $\pi_{bg}^* = \frac{1}{4}(1 + xy^2 - 4cy^2) + k_{bg}^*\frac{1}{4}(1 - y)y(x - 4c) > \pi_{bf}^* = \frac{1}{4}(x - 4c)y^2$ .

### Punishment-oriented culture.

We consider the following conditions.

a) If  $xy > 4c + 4cy$ : We further consider the following subconditions.

a.1) If  $N < N_{bg}$ :  $Pr_{bg}(I) = 1 > Pr_{bf}(I) = (2 - y)y$ ;  $\pi_{bg}^* = \frac{1}{4}(1 + xy - 4c)$ , and  $\pi_{bf}^* = \frac{1}{4}(1 + xy - 4c(2 - y)y) + k_{bf}^*c(1 - y)y$ . Since  $k_{bf}^* = \min\{1, \frac{Ny(1-y)}{2}\}$ ,  $\pi_{bf}^* > \frac{1}{4}(1 + xy - 4c(2 - y)y) + c(1 - y)y = \frac{1}{4}(1 + xy - 4cy) > \pi_{bg}^*$ .

a.2) If  $N \geq N_{bg}$ :  $Pr_{bg}(I) < y < Pr_{bf}(I)$ ;  $\pi_{bg}^* = \frac{1}{4}(1 + xy - 4c)$ , and  $\pi_{bf}^* = \frac{1}{4}(1 + xy - 4c(2 - y)y) + k_{bf}^*c(1 - y)y$ ,  $k_{bf}^* = \min\{1, \frac{Ny(1-y)}{2}\}$ . Based on a.1),  $\pi_{bg}^* > \pi_{bf}^*$  is satisfied.

b) If  $4cy(2 - y) < xy < 4c + 4cy$ :  $Pr_{bg}(I) = y^2 < Pr_{bf}(I)$ ;  $\pi_{bg}^* = \frac{1}{4}(1 + xy^2 - 4cy^2) > \pi_{bf}^* = \frac{1}{4}(1 + xy - 4c(2 - y)y) + k_{bf}^*c(1 - y)y$  if  $k_{bf}^* < \frac{8c-x}{4c}$ , that is, if  $N < \frac{2(8c-x)}{4cy(1-y)}$ .

c) If  $xy < 4cy(2 - y)$ :  $Pr_{bg}(I) = y^2 > Pr_{bf}(I) = 0$ ;  $\pi_{bg}^* = \frac{1}{4}(1 + xy^2 - 4cy^2) > \pi_{bf}^* = \frac{1}{4}$ .

### Proof of Table 6

The utility maximizing effort chosen by the researcher is  $k^* = E$ , where E is proportional to the exogenous reward on effort. This research effort is constant across research bias conditions. We solve for the equilibrium investment probability by plugging this value of  $k$  into the preceding analysis defining the conditions for when the firm will invest.

For the case of no research bias, the conditions are defined in (a)-(d) in Section 1 of the Appendix. For the case of research bias-against, the conditions are defined (a)-(c) of Section 2. For the case of research bias-in-favor, we conditions are defined in (a) and (b) of Section 3.
